# Supplementary material for: A colorimetric/luminescent benzene compound sensor based on a bis(σ-acetylide) platinum(ii) complex: enhancing selectivity and reversibility through dual-recognition sites strategy
Source: Royal Society of Chemistry journal article supplement (doi:10.1039/c5ra13987b), 2015-01-01
Supplement: c5ra13987b1.pdf [file c5ra13987b1.pdf]

## Supporting Information

**A colorimetric/luminescent benzene compounds sensor based on bis( $\sigma$ -acetylide) platinum(II) complex: enhancing selectivity and reversibility through dual-recognition sites strategy**

**Jun Ni,<sup>\*[a]</sup> Jia-Jia Kang,<sup>[a]</sup> Hui-Hui Wang,<sup>[a]</sup> Xu-Qiao Gai,<sup>[a]</sup> Xiao-Xin Zhang,<sup>[a]</sup> Ting Jia,<sup>[a]</sup>  
Liang Xu,<sup>[a]</sup> Yu-Zhen Pan,<sup>[a]</sup> and Jian-Jun Zhang<sup>\*[a]</sup>**

*Chemistry College, Dalian University of Technology, Dalian 116024, China.*

## Experimental Section

**Materials and Reagents.** All reactions were carried out under a dry argon atmosphere by using Schlenk techniques and vacuum-line systems unless otherwise specified. The solvents were dried, distilled, and degassed prior to use except that those for spectroscopic measurements were of spectroscopic grade. The ligands 3,8-bis(trimethylsilylethynyl)-1,10-phenanthroline (TMSC≡CPhenC≡CTMS) was prepared as the synthetic procedures described in literature.<sup>1</sup>

**Pt(TMSC≡CPhenC≡CTMS)Cl<sub>2</sub>.** 3,8-bis(trimethylsilylethynyl)-1,10-phenanthroline (37.2 mg, 0.1 mmol) and Pt(DMSO)<sub>2</sub>Cl<sub>2</sub> (42.2 mg, 0.1 mmol) were added to 50 mL of CH<sub>3</sub>CN with stirring for 12 h at ambient temperature. The solvent was removed and the product was purified by column chromatography on silica gel using dichloromethane as eluent. Yield: 81%. <sup>1</sup>H NMR (DMSO-d<sub>6</sub>, ppm): 0.338 (s, 18H, CH<sub>3</sub>), 8.226 (s, 2H, phen), 9.201 (d, 2H, *J* = 1.6 Hz, phen), 9.479 (d, 2H, *J* = 1.6 Hz, phen). Anal. Calcd for C<sub>22</sub>H<sub>24</sub>Cl<sub>2</sub>N<sub>2</sub>PtSi<sub>2</sub>: C, 41.38; H, 3.79; N, 4.39%. Found: C, 41.36; H, 3.77; N, 4.41%. IR (KBr disk, cm<sup>-1</sup>): 2165m (C≡C), 1252m (Si–C).

**Pt(TMSC≡CPhenC≡CTMS)(C≡CPhCl-4)<sub>2</sub> (1).** Pt(Me<sub>3</sub>SiC≡CphenC≡CSiMe<sub>3</sub>)Cl<sub>2</sub> (128 mg, 0.2 mmol), 4-chlorophenylacetylene (60 mg, 0.45 mmol), CuI (1 mg) and diisopropylamine (2 mL) were added to 50 mL of dichloromethane with stirring for 1 d at ambient temperature. The solvent was removed and the product was purified by column chromatography on silica gel using dichloromethane as eluent. Yield: 76%. <sup>1</sup>H NMR (CDCl<sub>3</sub>, ppm): 0.328 (s, 18H, CH<sub>3</sub>), 7.238 (d, 4H, *J* = 8.8 Hz, C<sub>6</sub>H<sub>4</sub>), 7.515 (d, 4H, *J* = 8.8 Hz, C<sub>6</sub>H<sub>4</sub>), 7.924 (s, 2H, phen), 8.600 (s, 2H, phen), 10.023 (s, 2H, phen). Anal. Calcd for C<sub>38</sub>H<sub>32</sub>Cl<sub>2</sub>N<sub>2</sub>PtSi<sub>2</sub>: C, 54.41; H, 3.85; N, 3.34%. Found: C, 54.39; H, 3.87; N, 3.31%. IR (KBr disk, cm<sup>-1</sup>): 2165s (C≡C-TMS), 2116m (C≡C-Pt), 1249m (Si–C). ESI-MS (*m/z*): 839 [M + H]<sup>+</sup>.

## Theoretical calculation methodology

Time-dependent density functional theory (DFT/TD-DFT)<sup>2-4</sup> with the gradient-corrected correlation functional PBE1PBE<sup>5</sup> was employed for the calculations. First, the structural geometry of complex **1** as an isolated molecule from the solvent phase in the ground state was optimized at the DFT level of the theory without symmetry constraint. To analyze the spectroscopic properties, 60 singlet and 10 triplet excited states were obtained to determine the vertical excitation energies by performing the TD-DFT calculations on the basis of the optimized geometrical structure. The Stuttgart-Dresden (SDD)<sup>6</sup> basis set consisting of the effective core potentials (ECP) was employed for the platinum(II), and the 6-31G (p, d) polarized double- $\zeta$  basis set was used for the remaining non-metal atoms. To precisely describe the electronic structures, one additional *f*-type polarization function was implemented for the platinum(II) atom ( $\alpha_f = 0.18$ ).<sup>7</sup>

As the solvate molecules were found to exert an insignificant influence on the calculated results, a pair of symmetry-related platinum(II) moieties (dimeric model without the solvate molecules) with the shortest intermolecular Pt...Pt distance were used to compare transition characteristics that contribute to the absorption and emission spectra in crystalline species **1**·0.5(CH<sub>2</sub>Cl<sub>2</sub>) and **1**·0.5(benzene). The Pt-Pt interactions were also estimated by using the Wiberg bond indices (WBIs)<sup>8</sup> with the natural bond orbital (NBO 3.1) program.<sup>9</sup> All calculations were performed with Gaussian 09.<sup>10</sup>

**Table S1.** Selected atomic distances (Å) and angles (°) of **1**·0.5(CH<sub>2</sub>Cl<sub>2</sub>) and **1**·0.5(Benzene).

|            | <b>1</b> ·0.5(CH <sub>2</sub> Cl <sub>2</sub> ) | <b>1</b> ·0.5(Benzene) |
|------------|-------------------------------------------------|------------------------|
| Pt···Pt    | 4.3805(4)                                       | 3.5107(6)              |
| Pt···C     | 1.949(7)                                        | 1.941(8)               |
|            | 1.945(6)                                        | 1.939(8)               |
| Pt···N     | 2.083(4)                                        | 2.075(6)               |
|            | 2.067(6)                                        | 2.074(6)               |
| N···Pt···N | 80.04(19)                                       | 80.5(2)                |
| C···Pt···C | 92.5(2)                                         | 88.4(3)                |
| N···Pt···C | 95.0(2)                                         | 95.6(3)                |
|            | 92.5(2)                                         | 95.6(3)                |

**Table S2.** Selected hydrogen-bonding geometry (Å,°) and aromatic-ring stacking interaction of **1**·0.5(CH<sub>2</sub>Cl<sub>2</sub>) and **1**·0.5(benzene).

| 1·0.5(CH <sub>2</sub> Cl <sub>2</sub> ) |            |              |              |                |                |
|-----------------------------------------|------------|--------------|--------------|----------------|----------------|
| <i>D-H...A</i>                          | <i>D-H</i> | <i>H...A</i> | <i>D...A</i> | <i>D-H...A</i> | Symmetry code  |
| C1-H1B...C11                            | 0.96       | 2.91         | 3.786        | 153            | x,3/2-y,-1/2+z |
| C10-H10...C11                           | 0.93       | 2.93         | 3.827        | 161            | x,y,-1+z       |
| C11-H11...C13'                          | 0.93       | 2.93         | 3.609        | 130            | x,y,-1+z       |
| C01'-H01C...π(Cg1)                      | 0.97       | 2.60         | 3.565        | 176            | 1-x,2-y,1-z    |
| C20-H20C...π(Cg2)                       | 0.96       | 2.98         | 3.906        | 163            | 2-x,2-y,-z     |
| C21-H21A...π(Cg3)                       | 0.96       | 2.66         | 3.602        | 167            | 1-x,2-y,-z     |
| C30-H30...C13'                          | 0.93       | 2.89         | 3.450        | 120            | 1-x,2-y,1-z    |
| C34-H34...C13                           | 0.93       | 2.94         | 3.866        | 176            | 1-x,2-y,1-z    |

Cg1 is the center of bond C23≡C24, Cg2 is the center of bond C4≡C5, Cg3 is the center of benzene ring containing C25 atom.

| 1·0.5(Benzene)   |            |              |              |                |               |
|------------------|------------|--------------|--------------|----------------|---------------|
| <i>D-H...A</i>   | <i>D-H</i> | <i>H...A</i> | <i>D...A</i> | <i>D-H...A</i> | Symmetry code |
| C10-H10...π(Cg6) | 0.93       | 2.75         | 3.655        | 165            | x,1/2-y,1/2+z |
| C11-H11...π(Cg4) | 0.93       | 2.73         | 3.633        | 163            | x,1/2-y,1/2+z |

|                 | Distance | Symmetry code |                 | Distance | Symmetry code |
|-----------------|----------|---------------|-----------------|----------|---------------|
| π(Cg1)...π(Cg2) | 3.639    | -             | π(Cg3)...π(Cg4) | 3.392    | 1-x,1-y,1-z   |
| π(Cg5)...π(Cg6) | 3.358    | 1-x,1-y,1-z   |                 |          |               |

Cg1 is the center of benzene ring containing C01 atom, Cg2 is benzene ring containing C10 atom, Cg3 is the center of pyridine ring containing N1 atom, Cg4 is the center of bond C31≡C32, Cg5 is the center of pyridine ring containing N2 atom, Cg6 is the center of bond C23≡C24.

**Table S3.** Partial molecular orbital compositions (%) in the ground state for **1**·0.5(CH<sub>2</sub>Cl<sub>2</sub>) by TD-DFT method at the PBE1PBE level.

| Orbital | Energy (eV) | MO Contribution (%) |                  |                                       |
|---------|-------------|---------------------|------------------|---------------------------------------|
|         |             | Pt (s/p/d)          | TMSC≡CPhenC≡CTMS | C≡CC <sub>6</sub> H <sub>4</sub> Cl-4 |
| LUMO+5  | -1.22       | 5.3(3/59/38)        | 88.4             | 6.3                                   |
| LUMO+4  | -1.30       | 6.8(6/68/26)        | 90.1             | 3.1                                   |
| LUMO+3  | -2.18       | 1.3(1/46/53)        | 97.7             | 1.0                                   |
| LUMO+2  | -2.21       | 1.4(35/52/13)       | 98.0             | 1.6                                   |
| LUMO+1  | -2.64       | 3.5(3/33/64)        | 95.0             | 1.5                                   |
| LUMO    | -2.65       | 3.6(18/38/44)       | 92.9             | 3.5                                   |
| HOMO    | -5.64       | 17.3(1/1/98)        | 1.9              | 80.8                                  |
| HOMO-1  | -5.66       | 16.3(1/0/99)        | 2.1              | 81.6                                  |
| HOMO-2  | -5.75       | 21.0(1/3/96)        | 3.7              | 75.3                                  |
| HOMO-3  | -5.78       | 19.3(2/6/92)        | 4.4              | 76.3                                  |
| HOMO-4  | -6.13       | 33.6(2/2/96)        | 7.7              | 58.7                                  |
| HOMO-5  | -6.20       | 33.0(1/3/96)        | 6.2              | 60.8                                  |
| HOMO-6  | -6.52       | 67.7(28/0/72)       | 7.9              | 24.4                                  |
| HOMO-7  | -6.60       | 14.2(6/2/92)        | 2.7              | 83.1                                  |
| HOMO-8  | -6.61       | 32.3(17/1/82)       | 3.9              | 63.8                                  |
| HOMO-9  | -6.70       | 73.7(26/0/74)       | 21.3             | 5.0                                   |
| HOMO-10 | -6.94       | 18.6(25/0/75)       | 72.8             | 8.6                                   |
| HOMO-11 | -6.95       | 4.7(29/1/70)        | 91.5             | 3.8                                   |
| HOMO-12 | -7.29       | 8.6(1/4/95)         | 27.7             | 63.7                                  |
| HOMO-15 | -7.35       | 1.7(9/14/77)        | 27.5             | 70.8                                  |
| HOMO-16 | -7.41       | 20.5(0/1/99)        | 18.8             | 60.7                                  |

**Table S4.** Absorption and emission transition properties of **1**·0.5(CH<sub>2</sub>Cl<sub>2</sub>) by TD-DFT method at the PBE1PBE level with the polarized continuum model (PCM).

| State<br>s      | <i>E</i> , nm<br>(eV) | O.S.   | Component     | Contri. | Assignment                           | Measured<br>Wavelength<br>(nm) |
|-----------------|-----------------------|--------|---------------|---------|--------------------------------------|--------------------------------|
| T <sub>1</sub>  | 574<br>(2.16)         | 0.0000 | HOMO→LUMO     | 44%     | <sup>3</sup> MLCT/ <sup>3</sup> LLCT | 582                            |
|                 |                       |        | HOMO-1→LUMO+1 | 24%     | <sup>3</sup> MLCT/ <sup>3</sup> LLCT |                                |
|                 |                       |        | HOMO-2→LUMO+1 | 14%     | <sup>3</sup> MLCT/ <sup>3</sup> LLCT |                                |
| T <sub>3</sub>  | 544<br>(2.28)         | 0.0000 | HOMO-2→LUMO   | 62%     | <sup>3</sup> MLCT/ <sup>3</sup> LLCT | 544                            |
|                 |                       |        | HOMO→LUMO+1   | 26%     | <sup>3</sup> MLCT/ <sup>3</sup> LLCT |                                |
| S <sub>1</sub>  | 535<br>(2.32)         | 0.0143 | HOMO→LUMO+1   | 84%     | <sup>1</sup> MLCT/ <sup>1</sup> LLCT | 525                            |
|                 |                       |        | HOMO-1→LUMO   | 13%     | <sup>1</sup> MLCT/ <sup>1</sup> LLCT |                                |
| S <sub>4</sub>  | 529<br>(2.34)         | 0.0087 | HOMO-1→LUMO   | 70%     | <sup>1</sup> MLCT/ <sup>1</sup> LLCT |                                |
|                 |                       |        | HOMO-2→LUMO   | 15%     | <sup>1</sup> MLCT/ <sup>1</sup> LLCT |                                |
| S <sub>6</sub>  | 511<br>(2.43)         | 0.0393 | HOMO-2→LUMO   | 85%     | <sup>1</sup> MLCT/ <sup>1</sup> LLCT | 484                            |
|                 |                       |        | HOMO-1→LUMO   | 11%     | <sup>1</sup> MLCT/ <sup>1</sup> LLCT |                                |
| S <sub>8</sub>  | 503<br>(2.47)         | 0.0216 | HOMO-3→LUMO+1 | 87%     | <sup>1</sup> MLCT/ <sup>1</sup> LLCT |                                |
| S <sub>10</sub> | 454<br>(3.59)         | 0.0334 | HOMO-4→LUMO+1 | 54%     | <sup>1</sup> MLCT/ <sup>1</sup> LLCT | 453                            |
|                 |                       |        | HOMO-1→LUMO+2 | 20%     | <sup>1</sup> MLCT/ <sup>1</sup> LLCT |                                |
|                 |                       |        | HOMO-5→LUMO   | 13%     | <sup>1</sup> MLCT/ <sup>1</sup> LLCT |                                |
|                 |                       |        | HOMO-2→LUMO+2 | 10%     | <sup>1</sup> MLCT/ <sup>1</sup> LLCT |                                |
| S <sub>12</sub> | 448<br>(2.77)         | 0.0086 | HOMO→LUMO+3   | 42%     | <sup>1</sup> MLCT/ <sup>1</sup> LLCT |                                |
|                 |                       |        | HOMO-2→LUMO+2 | 25%     | <sup>1</sup> MLCT/ <sup>1</sup> LLCT |                                |
|                 |                       |        | HOMO-1→LUMO+2 | 15%     | <sup>1</sup> MLCT/ <sup>1</sup> LLCT |                                |
|                 |                       |        | HOMO-3→LUMO+3 | 12%     | <sup>1</sup> MLCT/ <sup>1</sup> LLCT |                                |
| S <sub>16</sub> | 436<br>(2.85)         | 0.0479 | HOMO-1→LUMO+2 | 48%     | <sup>1</sup> MLCT/ <sup>1</sup> LLCT |                                |
|                 |                       |        | HOMO-2→LUMO+2 | 22%     | <sup>1</sup> MLCT/ <sup>1</sup> LLCT |                                |
|                 |                       |        | HOMO-5→LUMO   | 21%     | <sup>1</sup> MLCT/ <sup>1</sup> LLCT |                                |
|                 |                       |        | HOMO→LUMO+3   | 10%     | <sup>1</sup> MLCT/ <sup>1</sup> LLCT |                                |
| S <sub>17</sub> | 429<br>(2.89)         | 0.0532 | HOMO→LUMO+3   | 44%     | <sup>1</sup> MLCT/ <sup>1</sup> LLCT | 429                            |
|                 |                       |        | HOMO-2→LUMO+2 | 37%     | <sup>1</sup> MLCT/ <sup>1</sup> LLCT |                                |
| S <sub>20</sub> | 420<br>(2.95)         | 0.0439 | HOMO-3→LUMO+3 | 63%     | <sup>1</sup> MLCT/ <sup>1</sup> LLCT |                                |
|                 |                       |        | HOMO-6→LUMO+1 | 18%     | <sup>1</sup> MLCT/ <sup>1</sup> LLCT |                                |

|                 |               |        |                |     |                                      |     |
|-----------------|---------------|--------|----------------|-----|--------------------------------------|-----|
| S <sub>22</sub> | 418<br>(2.96) | 0.0247 | HOMO-6→LUMO+1  | 45% | <sup>1</sup> MLCT/ <sup>1</sup> LLCT |     |
|                 |               |        | HOMO-3→LUMO+3  | 22% | <sup>1</sup> MLCT/ <sup>1</sup> LLCT |     |
|                 |               |        | HOMO-9→LUMO    | 16% | <sup>1</sup> IL/ <sup>1</sup> LLCT   |     |
|                 |               |        | HOMO-8→LUMO+1  | 12% | <sup>1</sup> LLCT                    |     |
| S <sub>26</sub> | 386<br>(3.21) | 0.0123 | HOMO-8→LUMO+1  | 60% | <sup>1</sup> LLCT                    | 381 |
|                 |               |        | HOMO-6→LUMO+1  | 20% | <sup>1</sup> MLCT/ <sup>1</sup> LLCT |     |
|                 |               |        | HOMO-5→LUMO+2  | 14% | <sup>1</sup> MLCT/ <sup>1</sup> LLCT |     |
| S <sub>28</sub> | 382<br>(3.24) | 0.0164 | HOMO-7→LUMO    | 42% | <sup>1</sup> LLCT/ <sup>1</sup> IL   |     |
|                 |               |        | HOMO-4→LUMO+3  | 30% | <sup>1</sup> MLCT/ <sup>1</sup> LLCT |     |
|                 |               |        | HOMO-5→LUMO+2  | 16% | <sup>1</sup> MLCT/ <sup>1</sup> LLCT |     |
| S <sub>29</sub> | 379<br>(3.27) | 0.0267 | HOMO-9→LUMO    | 40% | <sup>1</sup> IL/ <sup>1</sup> LLCT   |     |
|                 |               |        | HOMO-4→LUMO+3  | 26% | <sup>1</sup> MLCT/ <sup>1</sup> LLCT |     |
|                 |               |        | HOMO-5→LUMO+2  | 18% | <sup>1</sup> MLCT/ <sup>1</sup> LLCT |     |
| S <sub>36</sub> | 342<br>(3.62) | 0.1037 | HOMO-1→LUMO+4  | 34% | <sup>1</sup> MLCT/ <sup>1</sup> LLCT | 359 |
|                 |               |        | HOMO-10→LUMO   | 31% | <sup>1</sup> IL/ <sup>1</sup> LLCT   |     |
|                 |               |        | HOMO-7→LUMO+2  | 10% | <sup>1</sup> LLCT/ <sup>1</sup> IL   |     |
| S <sub>40</sub> | 336<br>(3.69) | 0.0605 | HOMO-7→LUMO+2  | 28% | <sup>1</sup> LLCT/ <sup>1</sup> IL   | 337 |
|                 |               |        | HOMO-9→LUMO+2  | 21% | <sup>1</sup> IL/ <sup>1</sup> LLCT   |     |
|                 |               |        | HOMO-2→LUMO+4  | 19% | <sup>1</sup> MLCT/ <sup>1</sup> LLCT |     |
|                 |               |        | HOMO-8→LUMO+3  | 12% | <sup>1</sup> IL                      |     |
| S <sub>42</sub> | 335<br>(3.71) | 0.0221 | HOMO-9→LUMO+2  | 47% | <sup>1</sup> IL/ <sup>1</sup> LLCT   |     |
|                 |               |        | HOMO-8→LUMO+3  | 27% | <sup>1</sup> IL                      |     |
|                 |               |        | HOMO-2→LUMO+4  | 17% | <sup>1</sup> MLCT/ <sup>1</sup> LLCT |     |
| S <sub>44</sub> | 333<br>(3.73) | 0.0638 | HOMO-10→LUMO   | 45% | <sup>1</sup> IL/ <sup>1</sup> LLCT   |     |
|                 |               |        | HOMO-1→LUMO+4  | 19% | <sup>1</sup> MLCT/ <sup>1</sup> LLCT |     |
|                 |               |        | HOMO-11→LUMO+1 | 18% | <sup>1</sup> MLCT/ <sup>1</sup> LLCT |     |
| S <sub>47</sub> | 331<br>(3.75) | 0.1656 | HOMO-1→LUMO+4  | 31% | <sup>1</sup> MLCT/ <sup>1</sup> LLCT |     |
|                 |               |        | HOMO-11→LUMO+1 | 30% | <sup>1</sup> MLCT/ <sup>1</sup> LLCT |     |
|                 |               |        | HOMO-2→LUMO+4  | 17% | <sup>1</sup> MLCT/ <sup>1</sup> LLCT |     |
| S <sub>50</sub> | 324<br>(3.82) | 0.6015 | HOMO→LUMO+5    | 41% | <sup>1</sup> MLCT/ <sup>1</sup> LLCT |     |
|                 |               |        | HOMO-11→LUMO+1 | 30% | <sup>1</sup> MLCT/ <sup>1</sup> LLCT |     |
|                 |               |        | HOMO-2→LUMO+4  | 23% | <sup>1</sup> MLCT/ <sup>1</sup> LLCT |     |
| S <sub>52</sub> | 321           | 0.0349 | HOMO-10→LUMO+2 | 28% | <sup>1</sup> IL/ <sup>1</sup> LLCT   |     |



|                 |        |        |                |     |                                                       |     |
|-----------------|--------|--------|----------------|-----|-------------------------------------------------------|-----|
|                 | (3.86) |        | HOMO-12→LUMO   | 19% | <sup>1</sup> MLCT/ <sup>1</sup> LLCT/ <sup>1</sup> IL |     |
|                 |        |        | HOMO-11→LUMO+2 | 15% | <sup>1</sup> MLCT/ <sup>1</sup> LLCT                  |     |
|                 |        |        | HOMO-15→LUMO+1 | 13% | <sup>1</sup> LLCT                                     |     |
| S <sub>54</sub> | 319    | 0.2054 | HOMO-3→LUMO+5  | 87% | <sup>1</sup> MLCT/ <sup>1</sup> LLCT                  |     |
|                 | (3.89) |        |                |     |                                                       |     |
| S <sub>56</sub> | 308    | 0.0379 | HOMO-12→LUMO   | 37% | <sup>1</sup> MLCT/ <sup>1</sup> LLCT/ <sup>1</sup> IL | 307 |
|                 | (4.03) |        | HOMO-16→LUMO+1 | 33% | <sup>1</sup> IL/ <sup>1</sup> LLCT                    |     |
|                 |        |        | HOMO-15→LUMO+1 | 11% | <sup>1</sup> LLCT                                     |     |
| S <sub>60</sub> | 301    | 0.0664 | HOMO-5→LUMO+4  | 67% | <sup>1</sup> MLCT/ <sup>1</sup> LLCT                  |     |
|                 | (4.12) |        | HOMO-4→LUMO+5  | 27% | <sup>1</sup> MLCT/ <sup>1</sup> LLCT                  |     |

**Table S5.** Partial molecular orbital compositions (%) in the ground state for 1·0.5(Benzene) by TD-DFT method at the PBE1PBE level.

| Orbital | Energy (eV) | MO Contribution (%) |                  |                                       |
|---------|-------------|---------------------|------------------|---------------------------------------|
|         |             | Pt (s/p/d)          | TMSC≡CPhenC≡CTMS | C≡CC <sub>6</sub> H <sub>4</sub> Cl-4 |
| LUMO+5  | -1.01       | 4.2(39/46/15)       | 87.3             | 8.6                                   |
| LUMO+4  | -1.32       | 9.0(28/61/11)       | 84.5             | 6.5                                   |
| LUMO+3  | -2.00       | 0.9(2/78/20)        | 98.3             | 0.8                                   |
| LUMO+2  | -2.09       | 1.3(2/26/72)        | 97.0             | 1.7                                   |
| LUMO+1  | -2.61       | 2.2(40/29/31)       | 94.8             | 3.0                                   |
| LUMO    | -2.65       | 4.2(10/39/51)       | 93.1             | 2.7                                   |
| HOMO    | -5.57       | 22.5(0/6/94)        | 2.5              | 75.0                                  |
| HOMO-1  | -5.69       | 24.1(8/2/90)        | 3.0              | 72.9                                  |
| HOMO-2  | -5.75       | 38.2(15/2/83)       | 4.4              | 57.4                                  |
| HOMO-3  | -5.76       | 25.0(3/6/91)        | 4.6              | 70.4                                  |
| HOMO-4  | -6.16       | 65.9(23/2/75)       | 5.0              | 29.1                                  |
| HOMO-5  | -6.22       | 38.2(6/1/93)        | 3.1              | 58.7                                  |
| HOMO-6  | -6.22       | 30.9(1/1/98)        | 2.1              | 67.0                                  |
| HOMO-7  | -6.62       | 3.3(0/24/76)        | 13.3             | 83.4                                  |
| HOMO-8  | -6.64       | 3.5(0/23/77)        | 6.2              | 90.3                                  |
| HOMO-9  | -6.88       | 7.0(0/0/100)        | 78.7             | 14.3                                  |
| HOMO-10 | -6.99       | 0.7(17/38/45)       | 87.2             | 12.1                                  |
| HOMO-11 | -7.14       | 72.6(27/0/73)       | 3.6              | 23.7                                  |
| HOMO-12 | -7.15       | 10.5(2/1/97)        | 20.7             | 68.8                                  |
| HOMO-13 | -7.23       | 20.7(22/1/77)       | 3.3              | 76.0                                  |
| HOMO-14 | -7.28       | 3.5(0/1/99)         | 12.1             | 84.4                                  |
| HOMO-15 | -7.30       | 6.0(19/4/77)        | 4.4              | 89.6                                  |
| HOMO-16 | -7.40       | 7.2(2/2/96)         | 24.4             | 68.4                                  |

**Table S6.** Absorption and emission transition properties of **1**-0.5(Benzene) by TD-DFT method at the PBE1PBE level with the polarized continuum model (PCM).

| States          | $E$ , nm<br>(eV) | O.S.   | Component     | Contri. | Assignment                           | Measured<br>Wavelength<br>(nm) |
|-----------------|------------------|--------|---------------|---------|--------------------------------------|--------------------------------|
| T <sub>1</sub>  | 594<br>(2.09)    | 0.0000 | HOMO→LUMO     | 90%     | <sup>3</sup> MLCT/ <sup>3</sup> MLCT | 638                            |
| S <sub>3</sub>  | 542<br>(2.23)    | 0.0128 | HOMO-2→LUMO   | 49%     | <sup>1</sup> MLCT/ <sup>1</sup> LLCT | 542                            |
|                 |                  |        | HOMO-1→LUMO   | 31%     | <sup>1</sup> MLCT/ <sup>1</sup> LLCT |                                |
|                 |                  |        | HOMO-3→LUMO+1 | 10%     | <sup>1</sup> MLCT/ <sup>1</sup> LLCT |                                |
| S <sub>8</sub>  | 497<br>(2.49)    | 0.1103 | HOMO-3→LUMO+1 | 90%     | <sup>1</sup> MLCT/ <sup>1</sup> LLCT | 508                            |
| S <sub>9</sub>  | 460<br>(2.69)    | 0.0325 | HOMO-4→LUMO   | 73%     | <sup>1</sup> MLCT/ <sup>1</sup> LLCT | 461                            |
|                 |                  |        | HOMO→LUMO+2   | 17%     | <sup>1</sup> MLCT/ <sup>1</sup> LLCT |                                |
| S <sub>13</sub> | 445<br>(2.79)    | 0.0746 | HOMO→LUMO+2   | 69%     | <sup>1</sup> MLCT/ <sup>1</sup> LLCT |                                |
|                 |                  |        | HOMO-4→LUMO   | 16%     | <sup>1</sup> MLCT/ <sup>1</sup> LLCT |                                |
| S <sub>16</sub> | 437<br>(3.22)    | 0.0101 | HOMO-6→LUMO+1 | 97%     | <sup>1</sup> MLCT/ <sup>1</sup> LLCT | 435                            |
| S <sub>18</sub> | 423<br>(2.93)    | 0.0095 | HOMO-3→LUMO+2 | 61%     | <sup>1</sup> MLCT/ <sup>1</sup> LLCT | 423                            |
|                 |                  |        | HOMO-2→LUMO+3 | 25%     | <sup>1</sup> MLCT/ <sup>1</sup> LLCT |                                |
|                 |                  |        | HOMO-1→LUMO+3 | 14%     | <sup>1</sup> MLCT/ <sup>1</sup> LLCT |                                |
| S <sub>20</sub> | 412<br>(3.01)    | 0.0136 | HOMO-3→LUMO+2 | 41%     | <sup>1</sup> MLCT/ <sup>1</sup> LLCT | 409                            |
|                 |                  |        | HOMO-1→LUMO+3 | 33%     | <sup>1</sup> MLCT/ <sup>1</sup> LLCT |                                |
|                 |                  |        | HOMO-2→LUMO+3 | 26%     | <sup>1</sup> MLCT/ <sup>1</sup> LLCT |                                |
| S <sub>21</sub> | 407<br>(3.04)    | 0.0468 | HOMO-2→LUMO+3 | 50%     | <sup>1</sup> MLCT/ <sup>1</sup> LLCT |                                |
|                 |                  |        | HOMO-1→LUMO+3 | 45%     | <sup>1</sup> MLCT/ <sup>1</sup> LLCT |                                |
| S <sub>24</sub> | 386<br>(3.21)    | 0.0240 | HOMO-8→LUMO   | 71%     | <sup>1</sup> LLCT                    | 383                            |
|                 |                  |        | HOMO-7→LUMO+1 | 25%     | <sup>1</sup> LLCT/ <sup>1</sup> IL   |                                |
| S <sub>26</sub> | 375<br>(3.30)    | 0.0102 | HOMO-7→LUMO+1 | 74%     | <sup>1</sup> LLCT/ <sup>1</sup> IL   | 365                            |
|                 |                  |        | HOMO-8→LUMO   | 26%     | <sup>1</sup> LLCT                    |                                |
| S <sub>34</sub> | 345<br>(3.59)    | 0.0940 | HOMO-1→LUMO+4 | 61%     | <sup>1</sup> MLCT/ <sup>1</sup> LLCT | 344                            |
|                 |                  |        | HOMO-9→LUMO   | 39%     | <sup>1</sup> IL/ <sup>1</sup> LLCT   |                                |
| S <sub>36</sub> | 343<br>(3.61)    | 0.1046 | HOMO-2→LUMO+4 | 64%     | <sup>1</sup> MLCT/ <sup>1</sup> LLCT |                                |
|                 |                  |        | HOMO-9→LUMO   | 16%     | <sup>1</sup> IL/ <sup>1</sup> LLCT   |                                |

|                 |        |        |                |     |                                                       |     |
|-----------------|--------|--------|----------------|-----|-------------------------------------------------------|-----|
|                 |        |        | HOMO-11→LUMO+1 | 13% | <sup>1</sup> MLCT/ <sup>1</sup> LLCT                  |     |
| S <sub>38</sub> | 337    | 0.0147 | HOMO-11→LUMO+1 | 70% | <sup>1</sup> MLCT/ <sup>1</sup> LLCT                  | 330 |
|                 | (3.68) |        | HOMO-13→LUMO+1 | 11% | <sup>1</sup> MLCT/ <sup>1</sup> LLCT                  |     |
| S <sub>40</sub> | 334    | 0.2103 | HOMO-9→LUMO    | 38% | <sup>1</sup> IL/ <sup>1</sup> LLCT                    |     |
|                 | (3.71) |        | HOMO-1→LUMO+4  | 32% | <sup>1</sup> MLCT/ <sup>1</sup> LLCT                  |     |
|                 |        |        | HOMO-2→LUMO+4  | 25% | <sup>1</sup> MLCT/ <sup>1</sup> LLCT                  |     |
| S <sub>44</sub> | 326    | 0.0611 | HOMO→LUMO+5    | 50% | <sup>1</sup> MLCT/ <sup>1</sup> LLCT                  |     |
|                 | (3.80) |        | HOMO-10→LUMO+1 | 45% | <sup>1</sup> IL/ <sup>1</sup> LLCT                    |     |
| S <sub>45</sub> | 319    | 0.0160 | HOMO-12→LUMO   | 62% | <sup>1</sup> MLCT/ <sup>1</sup> LLCT/ <sup>1</sup> IL |     |
|                 | (4.13) |        |                |     |                                                       |     |
| S <sub>47</sub> | 318    | 0.7241 | HOMO-10→LUMO+1 | 50% | <sup>1</sup> IL/ <sup>1</sup> LLCT                    | 316 |
|                 | (3.90) |        | HOMO→LUMO+5    | 47% | <sup>1</sup> MLCT/ <sup>1</sup> LLCT                  |     |
| S <sub>51</sub> | 314    | 0.0665 | HOMO-13→LUMO+1 | 26% | <sup>1</sup> MLCT/ <sup>1</sup> LLCT                  |     |
|                 | (3.95) |        | HOMO-12→LUMO   | 20% | <sup>1</sup> MLCT/ <sup>1</sup> LLCT/ <sup>1</sup> IL |     |
|                 |        |        | HOMO-14→LUMO   | 10% | <sup>1</sup> IL/ <sup>1</sup> LLCT                    |     |
|                 |        |        | HOMO-16→LUMO   | 9%  | <sup>1</sup> IL/ <sup>1</sup> LLCT                    |     |
| S <sub>54</sub> | 309    | 0.1078 | HOMO-4→LUMO+4  | 42% | <sup>1</sup> MLCT/ <sup>1</sup> LLCT                  | 308 |
|                 | (4.02) |        | HOMO-14→LUMO   | 32% | <sup>1</sup> IL/ <sup>1</sup> LLCT                    |     |
|                 |        |        | HOMO-13→LUMO   | 10% | <sup>1</sup> MLCT/ <sup>1</sup> LLCT                  |     |
| S <sub>56</sub> | 307    | 0.0775 | HOMO-3→LUMO+5  | 65% | <sup>1</sup> MLCT/ <sup>1</sup> LLCT                  |     |
|                 | (4.04) |        | HOMO-5→LUMO+4  | 22% | <sup>1</sup> MLCT/ <sup>1</sup> LLCT                  |     |
|                 |        |        | HOMO-4→LUMO+4  | 10% | <sup>1</sup> MLCT/ <sup>1</sup> LLCT                  |     |
| S <sub>57</sub> | 306    | 0.0669 | HOMO-4→LUMO+4  | 38% | <sup>1</sup> MLCT/ <sup>1</sup> LLCT                  |     |
|                 | (4.04) |        | HOMO-14→LUMO   | 26% | <sup>1</sup> IL/ <sup>1</sup> LLCT                    |     |
|                 |        |        | HOMO-15→LUMO+1 | 22% | <sup>1</sup> LLCT                                     |     |
|                 |        |        | HOMO-16→LUMO   | 11% | <sup>1</sup> IL/ <sup>1</sup> LLCT                    |     |
| S <sub>59</sub> | 304    | 0.0523 | HOMO-5→LUMO+4  | 68% | <sup>1</sup> MLCT/ <sup>1</sup> LLCT                  |     |
|                 | (4.08) |        | HOMO-3→LUMO+5  | 21% | <sup>1</sup> MLCT/ <sup>1</sup> LLCT                  |     |

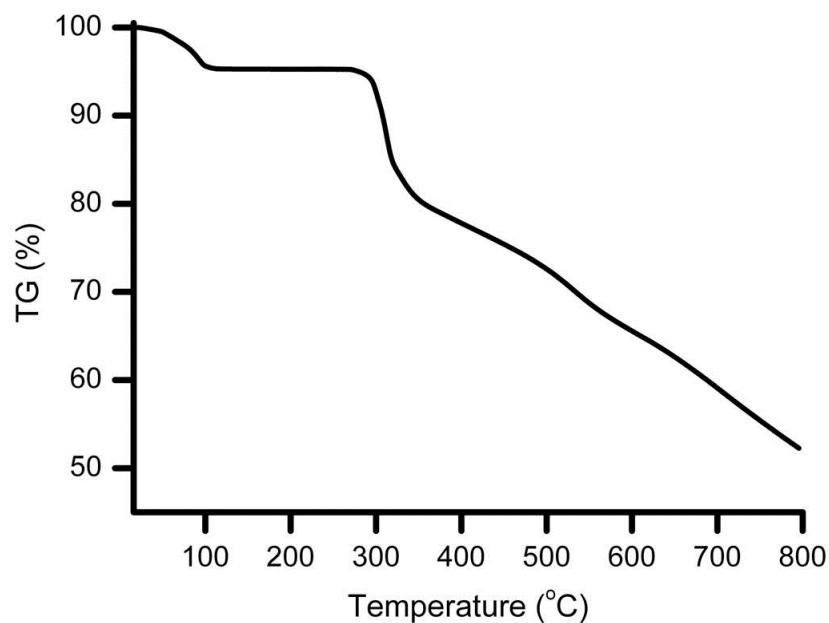

**Figure S1.** Thermal gravimetric (TG) curve for 1·0.5(CH<sub>2</sub>Cl<sub>2</sub>) showing weight loss of solvate CH<sub>2</sub>Cl<sub>2</sub> at 60-100°C and decomposition temperature above 280°C.

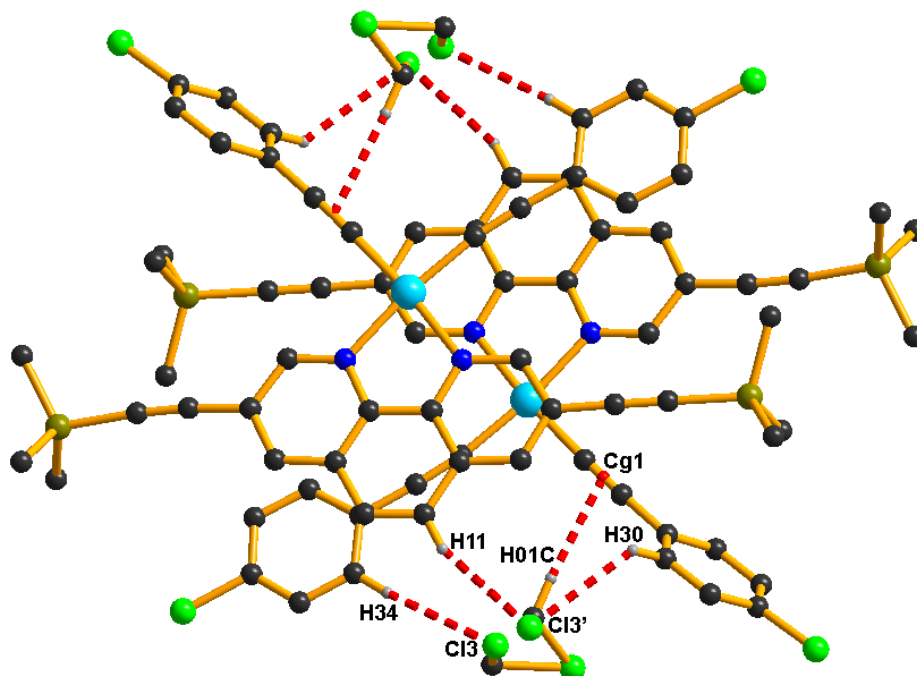

**Figure S2.** Crystal packing diagram of planar platinum(II) moieties in 1·0.5(CH<sub>2</sub>Cl<sub>2</sub>), showing C-H...Cl and C-H... $\pi$  hydrogen bond between solvate CH<sub>2</sub>Cl<sub>2</sub> molecule and platinum moieties.

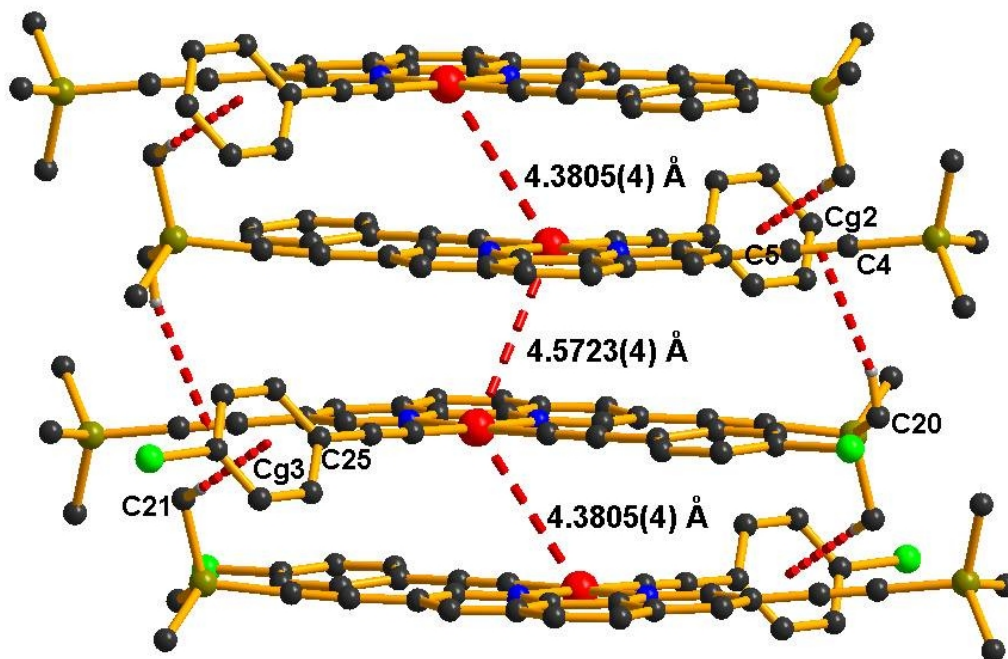

**Figure S3.** Crystal packing diagram of planar platinum(II) moieties in  $1 \cdot 0.5(\text{CH}_2\text{Cl}_2)$ , showing C-H... $\pi$  hydrogen bond between adjacent platinum moieties.

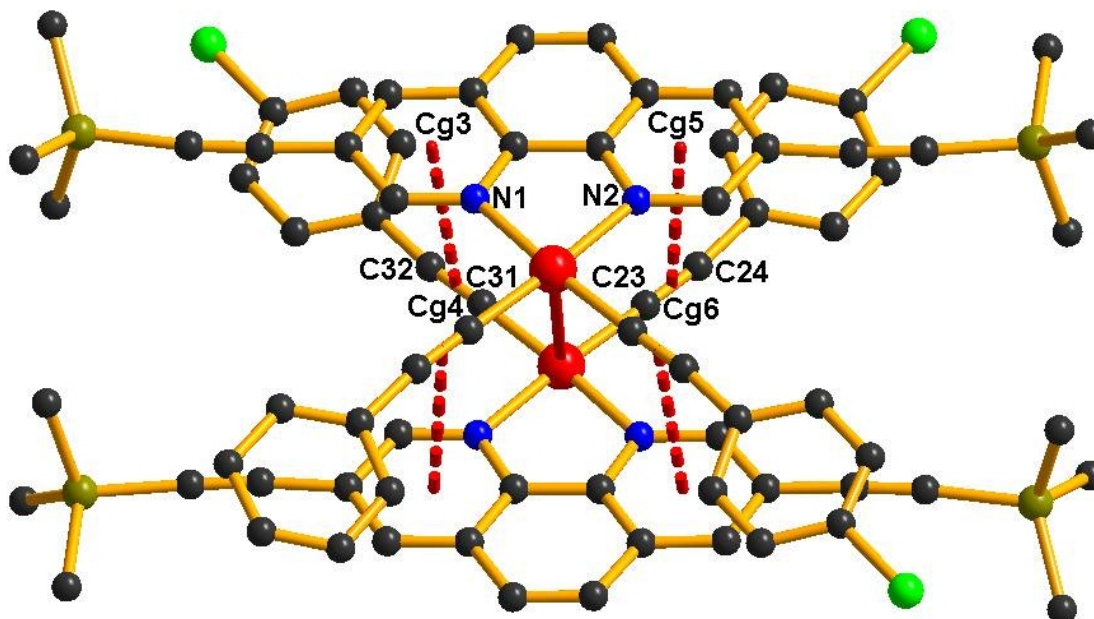

**Figure S4.** Crystal packing diagram of planar platinum(II) moieties in  $1 \cdot 0.5(\text{Benzene})$ , showing aromatic-ring  $\pi \cdots \pi$  stacking interaction between adjacent platinum moieties.

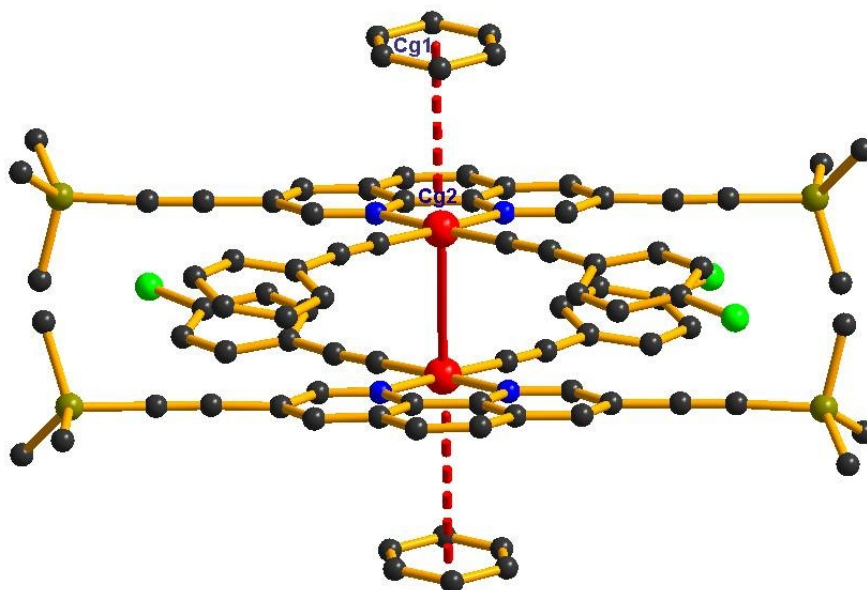

**Figure S5.** Crystal packing diagram of planar platinum(II) moieties in **1**·0.5(Benzene), showing aromatic-ring  $\pi\cdots\pi$  stacking interaction between solvate benzene molecule and platinum moieties.

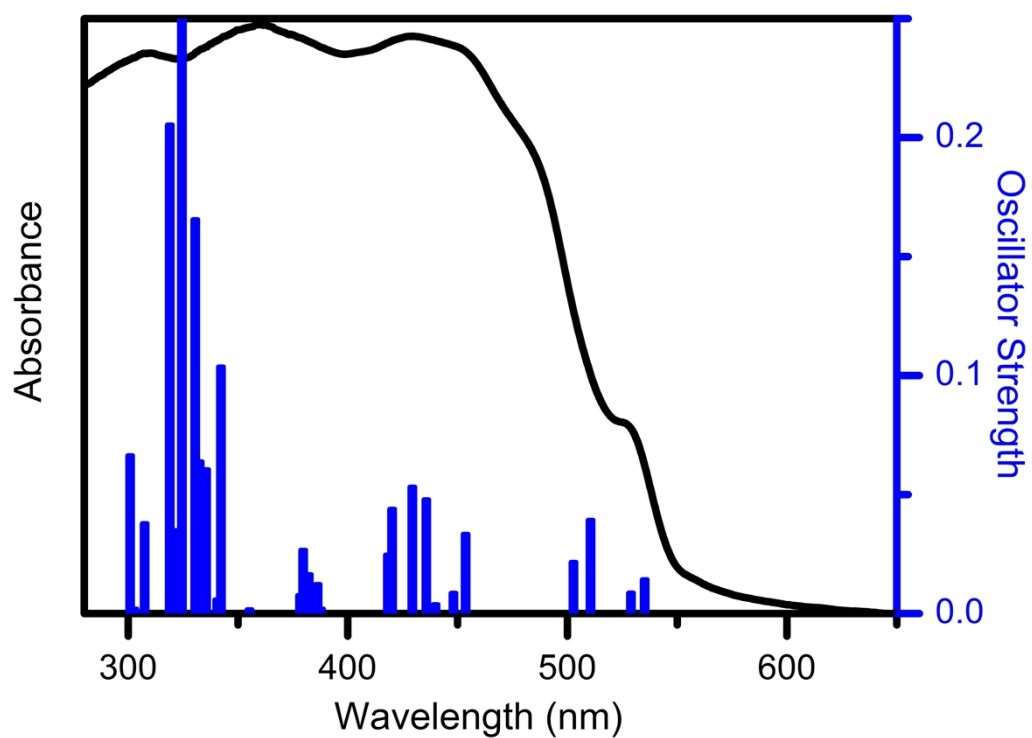

**Figure S6.** Calculated (blue vertical bars) and measured (black line) UV-Vis absorption spectra of solid-state **1**·0.5(CH<sub>2</sub>Cl<sub>2</sub>) at ambient temperature.

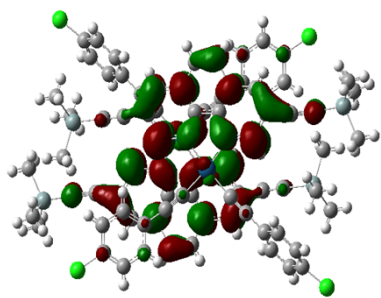

LUMO+5

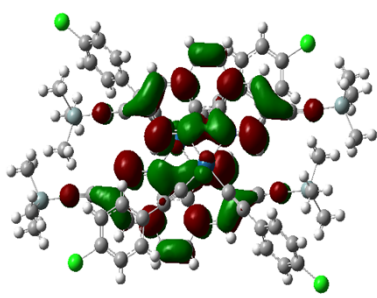

LUMO+4

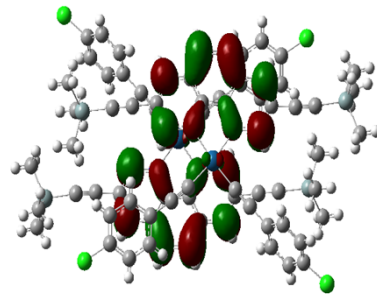

LUMO+3

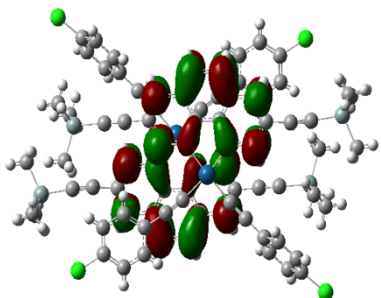

LUMO+2

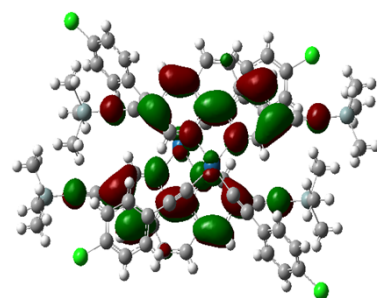

LUMO+1

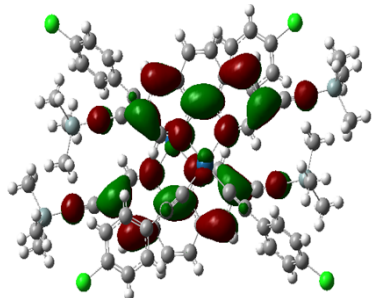

LUMO

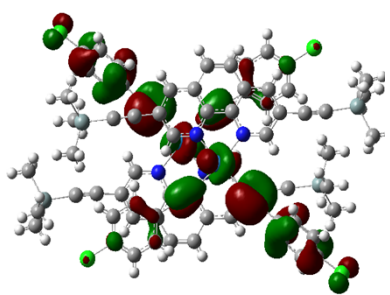

HOMO

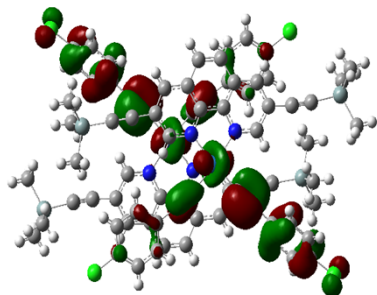

HOMO-1

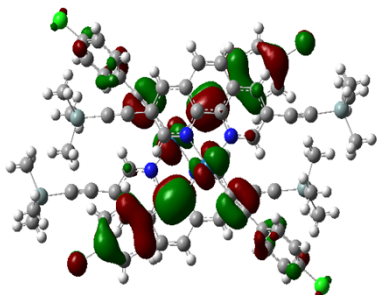

HOMO-2

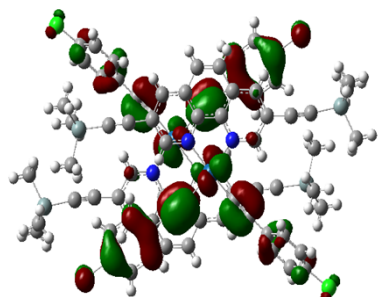

HOMO-3

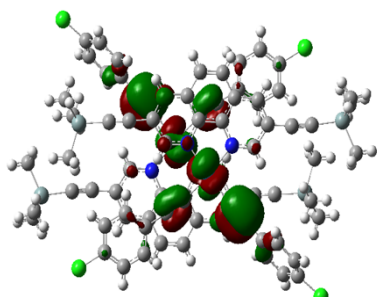

HOMO-4

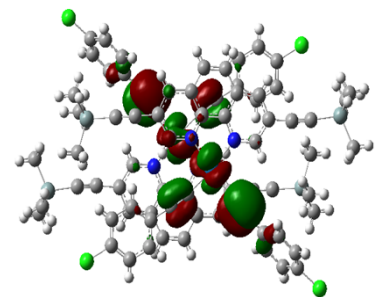

HOMO-5

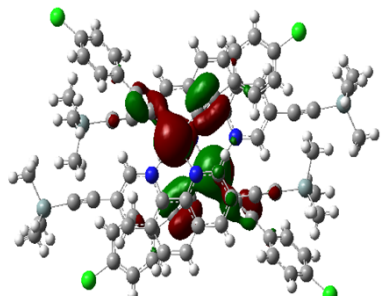

HOMO-6

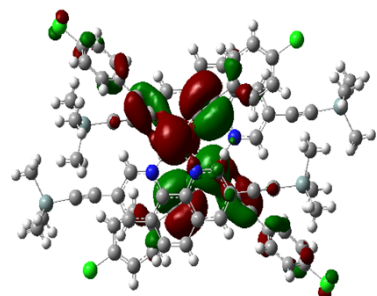

HOMO-7

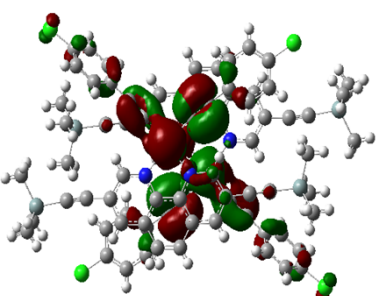

HOMO-8



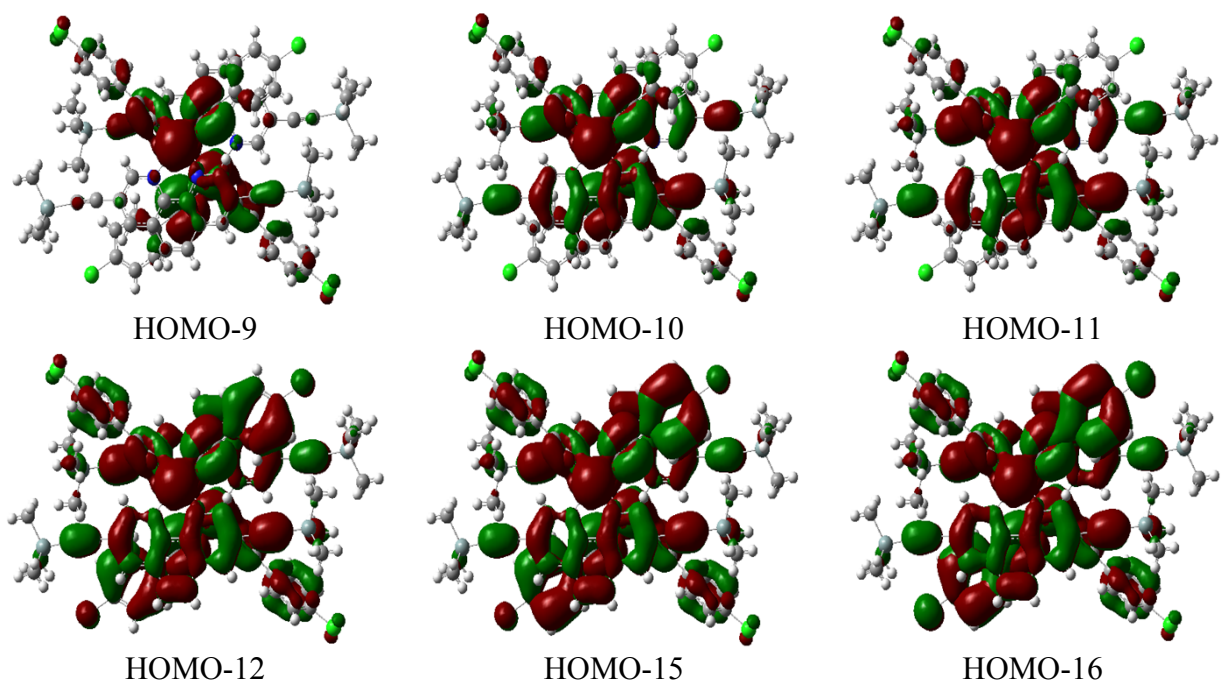

**Figure S7.** Plots of the frontier molecular orbitals involved in the absorption of **1**·0.5(CH<sub>2</sub>Cl<sub>2</sub>) in solid state (isovalue = 0.02).

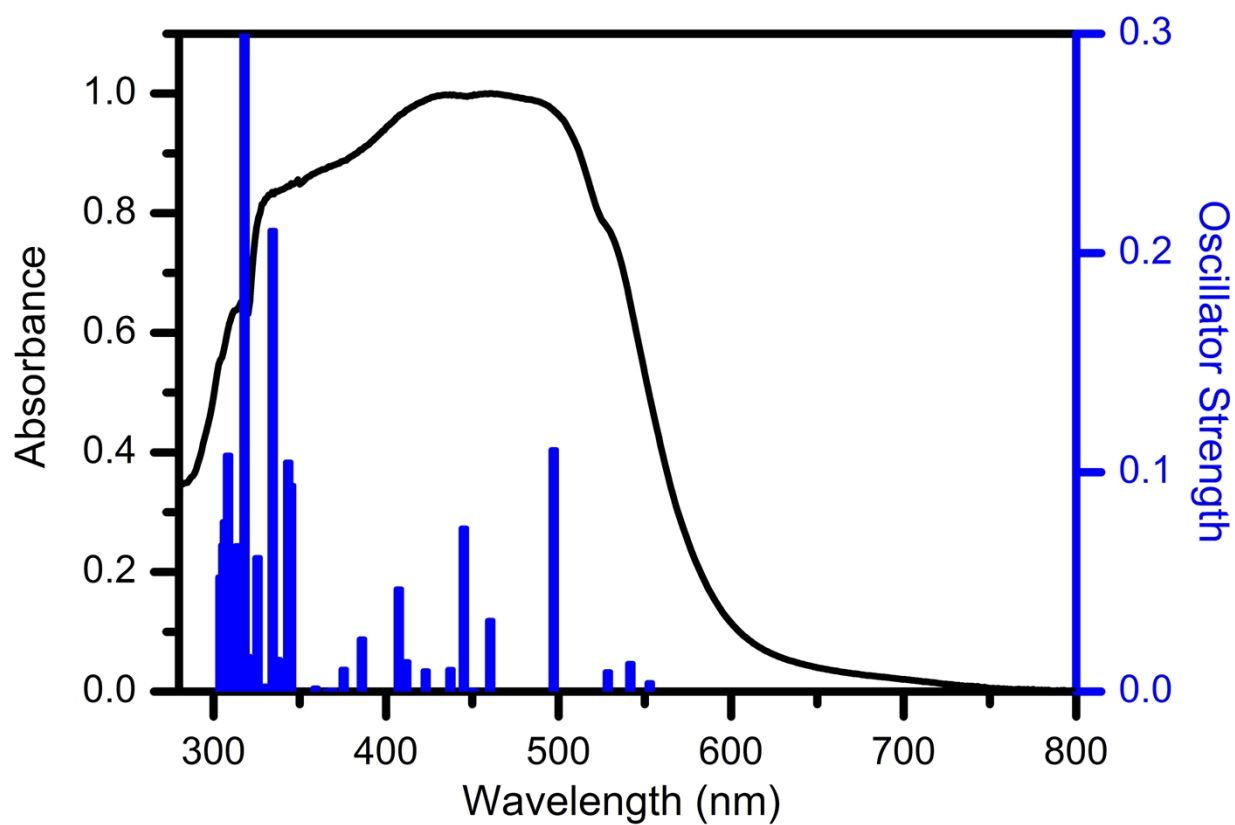

**Figure S8.** Calculated (blue vertical bars) and measured (black line) UV-Vis absorption spectra of solid-state  $1 \cdot 0.5(\text{Benzene})$  at ambient temperature.

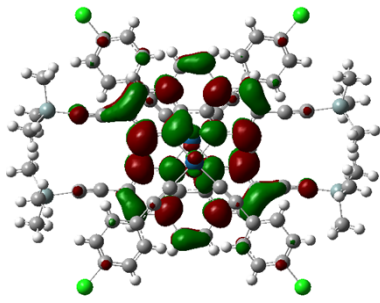

LUMO+5

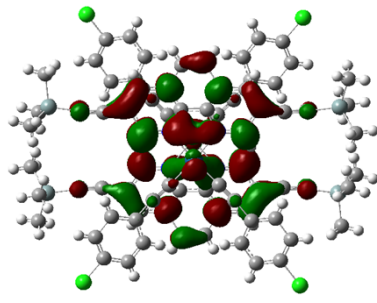

LUMO+4

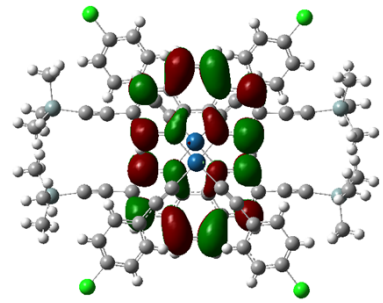

LUMO+3

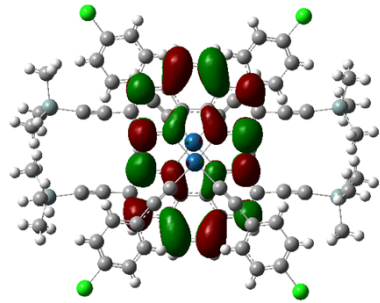

LUMO+2

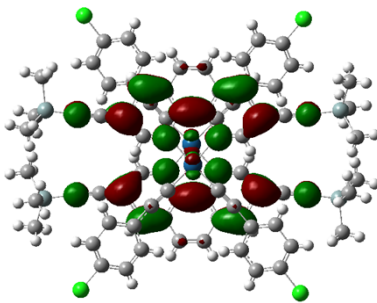

LUMO+1

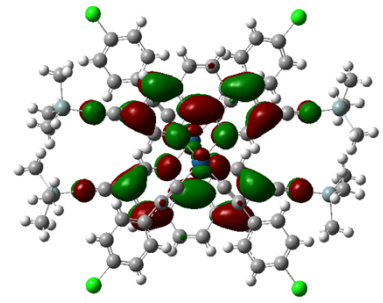

LUMO

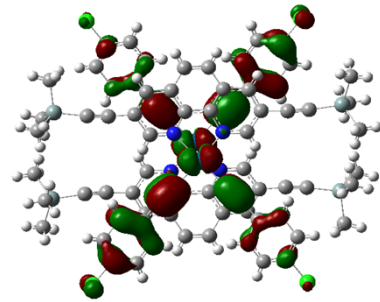

HOMO

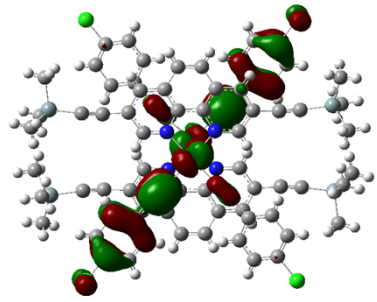

HOMO-1

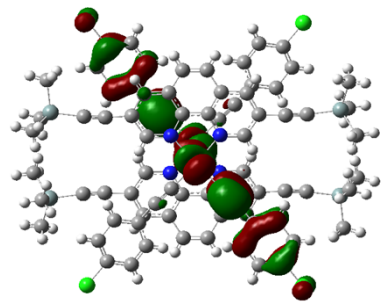

HOMO-2

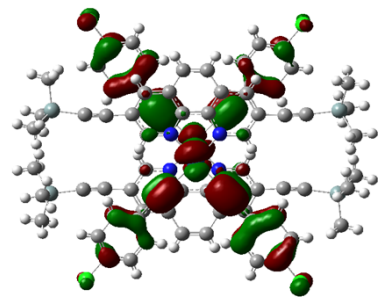

HOMO-3

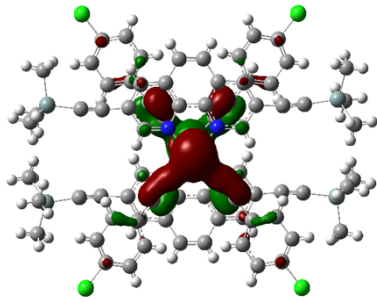

HOMO-4

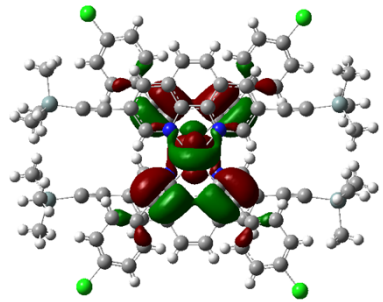

HOMO-5

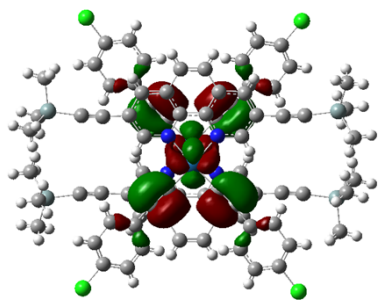

HOMO-6

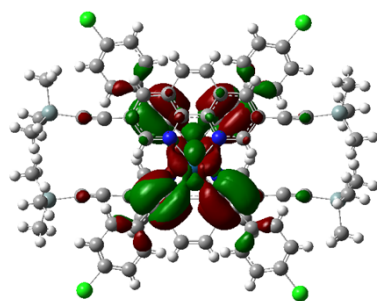

HOMO-7

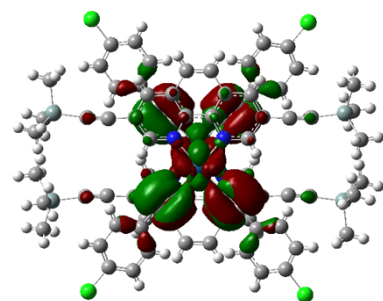

HOMO-8

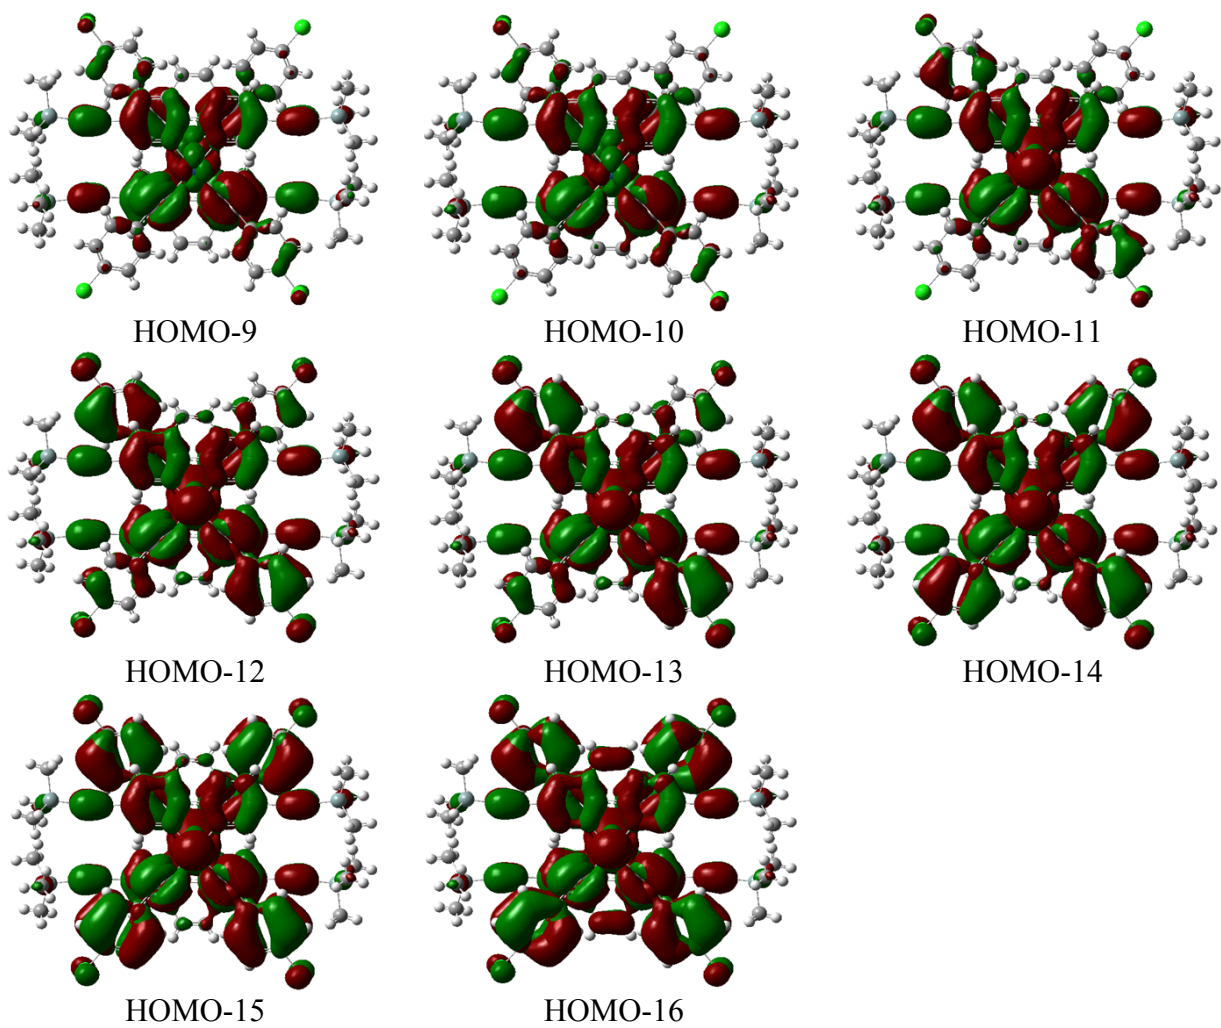

**Figure S9.** Plots of the frontier molecular orbitals involved in the absorption of 1·0.5(Benzene) in solid state (isovalue = 0.02).

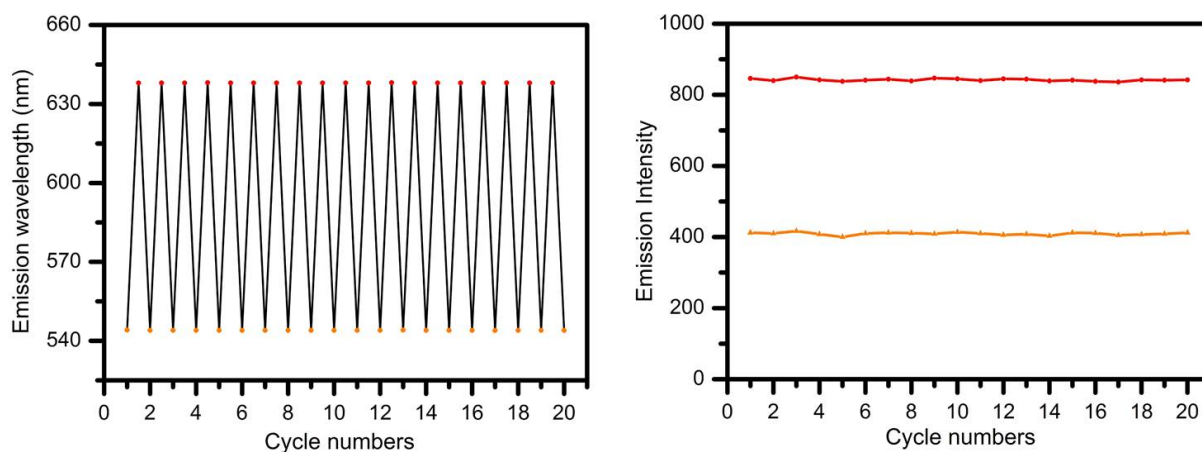

**Figure S10.** Changes of the emission wavelength (left) and intensity (right) in the reversible vapochromic cycles 1·0.5(CH<sub>2</sub>Cl<sub>2</sub>) ⇌ 1·0.5(Benzene), beginning with 1·0.5(CH<sub>2</sub>Cl<sub>2</sub>).

## References

1. R. Ziessel and C. Stroh, *Tetrahedron Lett.*, 2004, **45**, 4051.
2. A. D. Becke, *J. Chem. Phys.*, 1993, **98**, 5648.
3. M. E. Casida, C. Jamorski, K. C. Casida and D. R. Salahub, *J. Chem. Phys.*, 1998, **108**, 4439.
4. R. E. Stratmann, G. E. Scuseria and M. J. Frisch, *J. Chem. Phys.*, 1998, **109**, 8218.
5. J. P. Perdew, K. Burke and M. Ernzerhof, *Phys. Rev. Lett.*, 1996, **77**, 3865.
6. (a) D. Andrae, U. Haussermann, M. Dolg, H. Stoll and H. Preuss, *Theor. Chim. Acta*, 1990, **77**, 123; (b) P. Schwerdtfeger, M. Dolg, W. H. E. Schwarz, G. A. Bowmaker and P. D. W. Boyd, *J. Chem. Phys.*, 1989, **91**, 1762; (c) M. Dolg, U. Wedig, H. Stoll and H. Preuss, *J. Chem. Phys.*, 1987, **86**, 866.
7. (a) P. Pyykkö, N. Runeberg and F. Mendizabal, *Chem. Eur. J.*, 1997, **3**, 1451; (b) P. Pyykkö and F. Mendizabal, *Chem. Eur. J.*, 1997, **3**, 1458.
8. C. M. Breneman and K. B. Wiberg, *J. Comput. Chem.*, 1990, **11**, 361.
9. *NBO Version 3.1*, E. D. Glendening, J. K. Badenhoop, A. E. Reed, J. E. Carpenter, F. Weinhold, Theoretical Chemistry Institute, University of Wisconsin, Madison.
10. M. J. Frisch, G. W. Trucks, H. B. Schlegel, G. E. Scuseria, M. A. Robb, J. R. Cheeseman, G. Scalmani, V. Barone, B. Mennucci, G. A. Petersson, H. Nakatsuji, M. Caricato, X. Li, H. P. Hratchian, A. F. Izmaylov, J. Bloino, G. Zheng, J. L. Sonnenberg, M. Hada, M. Ehara, K. Toyota, R. Fukuda, J. Hasegawa, M. Ishida, T. Nakajima, Y. Honda, O. Kitao, H. Nakai, T.

Vreven, J. A. Montgomery, Jr., J. E. Peralta, F. Ogliaro, M. Bearpark, J. J. Heyd, E. Brothers, K. N. Kudin, V. N. Staroverov, R. Kobayashi, J. Normand, K. Raghavachari, A. Rendell, J. C. Burant, S. S. Iyengar, J. Tomasi, M. Cossi, N. Rega, J. M. Millam, M. Klene, J. E. Knox, J. B. Cross, V. Bakken, C. Adamo, J. Jaramillo, R. Gomperts, R. E. Stratmann, O. Yazyev, A. J. Austin, R. Cammi, C. Pomelli, J. W. Ochterski, R. L. Martin, K. Morokuma, V. G. Zakrzewski, G. A. Voth, P. Salvador, J. J. Dannenberg, S. Dapprich, A. D. Daniels, O. Farkas, J. B. Foresman, J. V. Ortiz, J. Cioslowski, D. J. Fox, Gaussian 09, Revision A.01, Gaussian, Inc., Wallingford, CT, **2009**.
